# Supplementary material
Source: publisher figshare collection journal article supplement (https://acs.figshare.com/ndownloader/files/4413940)
Supplement: Supplementary file 1 [file 4413940]

## Supporting Information

### Title:

A new DGT technique for measuring inorganic arsenic and selenium (IV) using a titanium dioxide-based adsorbent (Metsorb™)

### Authors:

*William W. Bennett<sup>a</sup>, Peter R. Teasdale<sup>a\*</sup>, Jared G. Panther<sup>a</sup>, David T. Welsh<sup>a</sup> and Dianne F. Jolley<sup>b</sup>*

<sup>a</sup> Environmental Futures Centre, Griffith University, Gold Coast campus, QLD 4222, Australia

<sup>b</sup> School of Chemistry, University of Wollongong, NSW 2522, Australia

Corresponding Author: [p.teasdale@griffith.edu.au](mailto:p.teasdale@griffith.edu.au)

## Contents

1. Details on the speciation of inorganic arsenic and selenium by Strong Anion Exchange – Solid Phase Extraction.
2. Table S-1. The effect of pH and ionic strength on the accumulation of inorganic arsenic and selenium by Metsorb™ DGT.
3. Table S-2. Calculated DBLs and DGT-measured arsenic concentrations for the field deployment data given in Figure 2. All values are means  $\pm$  1 standard deviation.
4. References

## **Details on the speciation of inorganic arsenic and selenium by Strong Anion**

### **Exchange – Solid Phase Extraction.**

#### *SAX-SPE for inorganic arsenic speciation*

Inorganic arsenic species were determined using a modification of the method of Le *et al.*<sup>1</sup> The pH of the sample or standard was adjusted to within pH 7-8 using dilute HNO<sub>3</sub> (Baseline; Seastar, Canada) or NaOH and a portion was retained for total arsenic analyses. 10 mL of sample was passed through a SAX-SPE cartridge (Supelco, USA) at a flow rate of approximately 2 mL min<sup>-1</sup> using a tube adapter and 20 mL syringe. The first eluent contained As<sup>III</sup> only, as it is uncharged at this pH and not retained on the anion exchange resin. As<sup>V</sup> is quantitatively retained on the cartridge and was eluted with 5 mL of 2.0 mol L<sup>-1</sup> HNO<sub>3</sub> (Baseline; Seastar, Canada). This is in contrast to Le and co-workers<sup>1</sup> who eluted As<sup>V</sup> with 1.0 mol L<sup>-1</sup> HCl. Both eluents and the original solution were analysed by ICP-MS.

#### *SAX-SPE for inorganic selenium speciation*

Inorganic selenium species were determined using a modification of the method of Gomez-Ariza *et al.*<sup>2</sup> The solution pH was adjusted to between pH 7-8, and a portion retained for total selenium analyses. 10 mL of sample was passed through a SAX-SPE cartridge at a flow rate of approximately 2 mL min<sup>-1</sup> using a tube adapter and 20 mL syringe. The first eluent contained no selenium as at pH 7-8 both inorganic species are anions and quantitatively retained on the cartridge, however, this fraction was retained and analysed for confirmation. Selenite was eluted with 5 mL of 1.0 mol L<sup>-1</sup> formic acid

followed by selenate with 5 mL of 2.0 mol L<sup>-1</sup> HNO<sub>3</sub>. Both of these eluents were retained for ICP-MS analysis. Formic acid increased the ionisation efficiency of selenium with ICP-MS analysis and so matrix matched quality control standards were prepared to account for this.

**Table S-1. The effect of pH and ionic strength on the accumulation of inorganic arsenic and selenium by Metsorb™ DGT.**

| pH/Ionic Strength                                                                                                | $C_{DGT}:C_{ICP-MS}^a$ |                 |                  |
|------------------------------------------------------------------------------------------------------------------|------------------------|-----------------|------------------|
|                                                                                                                  | As <sup>III</sup>      | As <sup>V</sup> | Se <sup>IV</sup> |
| pH 3.5                                                                                                           | 0.99 ± 0.02            | 1.11 ± 0.03     | 1.05 ± 0.05      |
| pH 5.0                                                                                                           | 0.99 ± 0.05            | 1.12 ± 0.03     | 0.96 ± 0.02      |
| pH 7.0                                                                                                           | 1.03 ± 0.05            | 1.02 ± 0.03     | 0.97 ± 0.05      |
| pH 8.5                                                                                                           | 1.06 ± 0.03            | 0.92 ± 0.02     | 0.86 ± 0.02      |
| 0.0001 mol L <sup>-1</sup>                                                                                       | 1.07 ± 0.08            | 0.78 ± 0.02     | 0.86 ± 0.04      |
| 0.001 mol L <sup>-1</sup>                                                                                        | 1.10 ± 0.05            | 1.07 ± 0.15     | 1.02 ± 0.07      |
| 0.1 mol L <sup>-1</sup>                                                                                          | 1.02 ± 0.02            | 1.06 ± 0.08     | 0.92 ± 0.03      |
| 0.75 mol L <sup>-1</sup>                                                                                         | 1.02 ± 0.10            | 1.08 ± 0.11     | 0.92 ± 0.08      |
| <i><sup>a</sup> Ratio of DGT measured concentration to ICP-MS measured concentration ± 1 standard deviation.</i> |                        |                 |                  |

**Table S-2. Calculated DBLs and DGT-measured arsenic concentrations for field deployments. All values are means  $\pm$  1 standard deviation.**

| <b>Field Site</b>                 | <b>Calculated DBL (cm)</b> | <b>DGT-measured As (<math>\mu\text{g L}^{-1}</math>) (<math>C_a</math>)</b> | <b>DGT-measured As (<math>\mu\text{g L}^{-1}</math>) assuming no DBL (<math>C_b</math>)</b> | <b><math>C_b:C_a</math></b> |
|-----------------------------------|----------------------------|-----------------------------------------------------------------------------|---------------------------------------------------------------------------------------------|-----------------------------|
| <b>Site 1 – Freshwater Stream</b> | 0.080 $\pm$ 0.013          | 3.04 $\pm$ 0.24                                                             | 2.05 $\pm$ 0.04                                                                             | 0.67                        |
| <b>Site 2 – Saltwater Marina</b>  | 0.067 $\pm$ 0.007          | 0.89 $\pm$ 0.04                                                             | 0.60 $\pm$ 0.01                                                                             | 0.67                        |

## References

- (1) Le, X. C.; Yalcin, S.; Ma, M. *Environ. Sci. Technol.* **2000**, *34*, 2342-2347.
- (2) Gomez-Ariza, J. L.; Giráldez, I.; Morales, E.; Pozas, J. A. *Analyst* **1999**, *124*, 75-78.
